# Supplementary material
Source: PubMed Central journal article supplement (PMC4599788)
Supplement: NIHMS168497-supplement-01.pdf [file NIHMS168497-supplement-01.pdf]

**Table S1: Differentially expressed genes at day 3 of nitrite therapy**

| Gene Name                                                             | Accession# | Ratio | SEM    | P Value |
|-----------------------------------------------------------------------|------------|-------|--------|---------|
| Metallothionein 4                                                     | NM_008631  | 6.01  | 0.03   | 0.018   |
| Myosin, heavy polypeptide 7, cardiac muscle, beta                     | NM_080728  | 5.35  | 0.003  | 0.014   |
| RIKEN cDNA 1600029D21 gene                                            | BC022950   | 4.98  | 0.016  | 0.0001  |
| Glutathione S-transferase, alpha 2 (Yc2)                              | NM_008182  | 4.38  | 0.012  | 0.001   |
| Troponin I, skeletal, slow 1                                          | NM_021467  | 4.23  | 0.002  | 0.017   |
| Troponin T1, skeletal, slow                                           | NM_011618  | 4.15  | 0.003  | 0.035   |
| Four and a half LIM domains 1                                         | BF466856   | 4.03  | 0.004  | 0.004   |
| Metallothionein 3                                                     | NM_013603  | 3.88  | 0.006  | 0.026   |
| Prostaglandin reductase 2                                             | BE283373   | 3.79  | 0.007  | 0.002   |
| Myosin, light polypeptide 2, regulatory, cardiac, slow                | NM_010861  | 3.56  | 0.002  | 0.047   |
| Troponin C, cardiac/slow skeletal                                     | NM_009393  | 3.49  | 0.001  | 0.038   |
| DIX domain containing 1                                               | BB758432   | 3.39  | 0.009  | 0.004   |
| Flavin containing monooxygenase 5                                     | NM_010232  | 3.33  | 0.04   | 0.005   |
| zinc finger protein 697                                               | BC002224   | 3.28  | 0.02   | 0.012   |
| Park2 co-regulated                                                    | AK005771   | 3.19  | 0.007  | 0.001   |
| Kin of IRRE like 3 (Drosophila)                                       | AK005197   | 3.17  | 0.055  | 0.025   |
| Potassium voltage-gated channel, subfamily Q, member 5                | AV362204   | 3.12  | 0.028  | 0.001   |
| DnaJ (Hsp40) homolog, subfamily A, member 4                           | NM_021422  | 3.05  | 0.001  | 0.004   |
| Myomesin family, member 3                                             | AW553161   | 2.99  | 0.006  | 0.006   |
| ATPase, (Na+)/K+ transporting, beta 4 polypeptide                     | NM_133690  | 2.89  | 0.012  | 0.005   |
| Ankyrin repeat domain 2 (stretch responsive muscle)                   | NM_020033  | 2.86  | 0.0001 | 0.006   |
| Chemokine (C-X-C motif) receptor 6                                    | AF301018   | 2.84  | 0.015  | 0.028   |
| Cysteine and glycine-rich protein 3                                   | NM_013808  | 2.82  | 0.0001 | 0.007   |
| myosin, heavy polypeptide 2, skeletal muscle, adult                   | BC008538   | 2.8   | 0.0001 | 0.0001  |
| Troponin T2, cardiac                                                  | L47552     | 2.75  | 0.004  | 0.017   |
| Zinc finger protein 64                                                | BF020964   | 2.7   | 0.019  | 0.032   |
| UDP-Gal:betaGlcNAc beta 1,4-galactosyltransferase, polypeptide 4      | AF158746   | 2.62  | 0.019  | 0.007   |
| RIKEN cDNA 2310002L09 gene                                            | AK009097   | 2.58  | 0.001  | 0.0001  |
| Tropomyosin 3, gamma                                                  | NM_022314  | 2.58  | 0.002  | 0.035   |
| Myogenin                                                              | NM_031189  | 2.57  | 0.001  | 0.004   |
| Prostaglandin-endoperoxide synthase 2                                 | M94967     | 2.54  | 0.017  | 0.011   |
| Myozenin 2                                                            | NM_021503  | 2.53  | 0.001  | 0.013   |
| TatD DNase domain containing 1                                        | BB761179   | 2.53  | 0.002  | 0.003   |
| Transcribed locus                                                     | BM730637   | 2.53  | 0.008  | 0.001   |
| Transcribed locus                                                     | AV231357   | 2.51  | 0.001  | 0.0001  |
| Transcribed locus                                                     | AV346607   | 2.51  | 0.017  | 0.01    |
| Cysteine-rich C-terminal 1                                            | AK009010   | 2.5   | 0.033  | 0.009   |
| Glycogen synthase 1, muscle                                           | NM_030678  | 2.49  | 0.001  | 0.0001  |
| Solute carrier family 22 (organic cation transporter), member 4       | BC010590   | 2.49  | 0.011  | 0.031   |
| Solute carrier family 16 (monocarboxylic acid transporters), member 3 | NM_030696  | 2.48  | 0.0001 | 0.0001  |
| Chloride intracellular channel 5                                      | BB610000   | 2.47  | 0.003  | 0.011   |
| Transmembrane protein 143                                             | AK013719   | 2.47  | 0.006  | 0.01    |
| HECT domain containing 2                                              | AW114007   | 2.46  | 0.013  | 0.034   |
| UEV and lactate/malate dehydrogenase domains                          | NM_016855  | 2.46  | 0.014  | 0.007   |
| Cyclic AMP-regulated phosphoprotein, 21                               | NM_033264  | 2.45  | 0.005  | 0.005   |

|                                                                                                         |           |      |        |        |
|---------------------------------------------------------------------------------------------------------|-----------|------|--------|--------|
| Fibroblast growth factor 13                                                                             | AF020737  | 2.43 | 0.004  | 0.001  |
| RIKEN cDNA 8030451F13 gene                                                                              | AW743000  | 2.43 | 0.001  | 0.006  |
| Cadherin 5                                                                                              | NM_009868 | 2.41 | 0.009  | 0.013  |
| Mus musculus tumor-associated antigen 1 (Taa1), mRNA.                                                   | NM_009310 | 2.39 | 0.005  | 0.026  |
| TEA domain family member 4                                                                              | D87965    | 2.38 | 0.01   | 0.0001 |
| Transcribed locus                                                                                       | BB322227  | 2.38 | 0.001  | 0.007  |
| Lactate dehydrogenase B                                                                                 | AV219418  | 2.37 | 0.002  | 0.004  |
| LIM and cysteine-rich domains 1                                                                         | BC019124  | 2.37 | 0.0001 | 0.011  |
| Transcribed locus                                                                                       | BM730637  | 2.33 | 0.008  | 0.0001 |
| Rhomboid, veinlet-like 1 (Drosophila)                                                                   | BC021549  | 2.32 | 0.004  | 0.002  |
| RIKEN cDNA 4833439L19 gene                                                                              | NM_029241 | 2.32 | 0.002  | 0.002  |
| Smoothelin-like 1                                                                                       | NM_024230 | 2.29 | 0.002  | 0.013  |
| Target of myb1-like 2 (chicken)                                                                         | BM226574  | 2.29 | 0.01   | 0.003  |
| Tumor necrosis factor receptor superfamily, member 19                                                   | AF167554  | 2.29 | 0.019  | 0.007  |
| Predicted gene, ENSMUSG00000074670                                                                      | BC002189  | 2.26 | 0.015  | 0.012  |
| Sterile alpha motif domain containing 4                                                                 | BB626348  | 2.26 | 0.012  | 0.036  |
| Ubiquitin-conjugating enzyme E2G 2                                                                      | AF296657  | 2.26 | 0.002  | 0.005  |
| Cell growth regulator with EF hand domain 1                                                             | BC023116  | 2.25 | 0.005  | 0.005  |
| Heat shock protein family, member 7 (cardiovascular)                                                    | BG968304  | 2.23 | 0.0001 | 0.005  |
| Small proline-rich protein 1A                                                                           | NM_009264 | 2.23 | 0.008  | 0.011  |
| FXFD domain-containing ion transport regulator 6                                                        | AB032010  | 2.22 | 0.003  | 0.021  |
| Plasmacytoma variant translocation 1                                                                    | BI453402  | 2.2  | 0.033  | 0.042  |
| Uridine-cytidine kinase 2                                                                               | NM_030724 | 2.2  | 0.001  | 0.001  |
| DNA-damage-inducible transcript 4                                                                       | AK017926  | 2.19 | 0.001  | 0.011  |
| Expressed sequence AU040829                                                                             | BB079908  | 2.18 | 0.003  | 0.004  |
| Myosin, light polypeptide 4                                                                             | NM_010858 | 2.18 | 0.001  | 0.01   |
| Popeye domain containing 2                                                                              | NM_022318 | 2.18 | 0.001  | 0.002  |
| Dynamin 1-like                                                                                          | BC027538  | 2.14 | 0.006  | 0.003  |
| ARP1 actin-related protein 1 homolog B (yeast)                                                          | BG801851  | 2.13 | 0.001  | 0.002  |
| Integrin alpha 7                                                                                        | NM_008398 | 2.13 | 0.001  | 0.001  |
| Sodium channel, voltage-gated, type V, alpha                                                            | BB516098  | 2.13 | 0.004  | 0.003  |
| SRY-box containing gene 17                                                                              | NM_011441 | 2.13 | 0.003  | 0.013  |
| Neural cell adhesion molecule 1                                                                         | NM_010875 | 2.12 | 0.005  | 0.017  |
| Potassium inwardly rectifying channel, subfamily J, member 11                                           | U73626    | 2.12 | 0.002  | 0.0001 |
| Suppressor of cytokine signaling 3                                                                      | BB241535  | 2.12 | 0.001  | 0.002  |
| Transcribed locus                                                                                       | AK017367  | 2.12 | 0.012  | 0.004  |
| ESTs                                                                                                    | BB515192  | 2.11 | 0.002  | 0.018  |
| mitochondrial carrier homolog 2                                                                         | AV067008  | 2.11 | 0.0001 | 0.016  |
| Purinergic receptor P2Y, G-protein coupled 2                                                            | NM_008773 | 2.11 | 0.004  | 0.003  |
| Solute carrier family 25 (mitochondrial carrier, phosphate carrier), member 25                          | BC019978  | 2.11 | 0.001  | 0.013  |
| Transcribed locus, moderately similar to NP_766184.1 SEC24 related gene family, member C [Mus musculus] | AK018074  | 2.11 | 0.018  | 0.042  |
| EH-domain containing 2                                                                                  | BC027084  | 2.1  | 0.004  | 0.011  |
| Leucine rich repeat protein 1, neuronal                                                                 | NM_008516 | 2.1  | 0.005  | 0.027  |
| Gene model 129, (NCBI)                                                                                  | BB407125  | 2.09 | 0.005  | 0.004  |
| Transcribed locus                                                                                       | BB766817  | 2.09 | 0.01   | 0.037  |
| Coiled-coil domain containing 109A                                                                      | AV259428  | 2.08 | 0.007  | 0.004  |
| AHNAK nucleoprotein (desmoyokin)                                                                        | AK009866  | 2.07 | 0.004  | 0.02   |
| CUB and zona pellucida-like domains 1                                                                   | NM_008411 | 2.07 | 0.016  | 0.002  |

|                                                                                          |           |       |        |        |
|------------------------------------------------------------------------------------------|-----------|-------|--------|--------|
| Keratin 18                                                                               | NM_010664 | 2.07  | 0.016  | 0.03   |
| Mus musculus RIKEN cDNA 1110055E19 gene (1110055E19Rik), mRNA.                           | NM_026839 | 2.07  | 0.0001 | 0.011  |
| Vitronectin                                                                              | BB251864  | 2.06  | 0.013  | 0.026  |
| Solute carrier family 8 (sodium/calcium exchanger), member 3                             | NM_080440 | 2.05  | 0.006  | 0.009  |
| ESTs                                                                                     | BB386239  | 2.04  | 0.011  | 0.036  |
| RIKEN cDNA 1700052N19 gene                                                               | NM_024261 | 2.04  | 0.009  | 0.003  |
| RIKEN cDNA 2900073G15 gene                                                               | NM_026064 | 2.04  | 0.001  | 0.003  |
| Transcribed locus                                                                        | AW553649  | 2.04  | 0.025  | 0.03   |
| Transcribed locus                                                                        | BB764453  | 2.04  | 0.004  | 0.002  |
| TBC1 domain family, member 1                                                             | BB501891  | 2.03  | 0.01   | 0.014  |
| Calsequestrin 2                                                                          | NM_009814 | 2.02  | 0.002  | 0.001  |
| Coagulation factor II (thrombin) receptor-like 1                                         | NM_007974 | 2.02  | 0.006  | 0.027  |
| Myosin light chain 2, precursor lymphocyte-specific                                      | NM_021611 | 2.02  | 0.012  | 0.028  |
| EGL nine homolog 3 ( <i>C. elegans</i> )                                                 | BB284358  | 2.01  | 0.001  | 0.006  |
| CDNA sequence BC048679                                                                   | AV360837  | 2     | 0.016  | 0.023  |
| Methylcrotonoyl-Coenzyme A carboxylase 2 (beta)                                          | BI155184  | 2     | 0.01   | 0.001  |
| Paired-like homeodomain transcription factor 2                                           | U80011    | 2     | 0.003  | 0.034  |
| TAF7 RNA polymerase II, TATA box binding protein (TBP)-associated factor                 | AV213552  | 2     | 0.015  | 0.002  |
| Claspin homolog ( <i>Xenopus laevis</i> )                                                | BG067086  | 0.5   | 0.003  | 0.022  |
| ESTs, Moderately similar to S12207 hypothetical protein ( <i>M.musculus</i> )            | BM119933  | 0.5   | 0.007  | 0.001  |
| Myosin Va                                                                                | NM_010864 | 0.5   | 0.001  | 0.003  |
| Transcribed locus                                                                        | BM213788  | 0.5   | 0.009  | 0.047  |
| Transcribed locus                                                                        | BG067469  | 0.5   | 0.004  | 0.008  |
| Zinc finger, RAN-binding domain containing 3                                             | BM228797  | 0.5   | 0.002  | 0.006  |
| DnaJ (Hsp40) homolog, subfamily B, member 14                                             | BE952491  | 0.498 | 0.003  | 0.013  |
| ESTs                                                                                     | BB206454  | 0.498 | 0.004  | 0.005  |
| ESTs                                                                                     | BB467915  | 0.498 | 0.007  | 0.009  |
| Glia maturation factor, gamma                                                            | NM_022024 | 0.498 | 0.001  | 0.011  |
| RIKEN cDNA B430201A12 gene                                                               | BB325849  | 0.498 | 0.001  | 0.0001 |
| Solute carrier family 37 (glycerol-3-phosphate transporter), member 2                    | BC022752  | 0.498 | 0.002  | 0.017  |
| Splicing factor proline/glutamine rich (polypyrimidine tract binding protein associated) | BI738328  | 0.498 | 0.001  | 0.005  |
| Tousled-like kinase 2 ( <i>Arabidopsis</i> )                                             | BM198864  | 0.498 | 0.008  | 0.016  |
| Transcribed locus                                                                        | AA266723  | 0.498 | 0.004  | 0.025  |
| DNA segment, Chr 8, ERATO Doi 82, expressed                                              | BM195829  | 0.495 | 0.003  | 0.029  |
| RIKEN cDNA 2810417H13 gene                                                               | AK017673  | 0.495 | 0.0001 | 0.005  |
| Transcribed locus                                                                        | BB362579  | 0.495 | 0.009  | 0.019  |
| Transcribed locus                                                                        | BB192700  | 0.495 | 0.004  | 0.025  |
| Activated leukocyte cell adhesion molecule                                               | AV315205  | 0.493 | 0.009  | 0.007  |
| ESTs                                                                                     | BB499275  | 0.493 | 0.008  | 0.003  |
| F-box protein 5                                                                          | AK011820  | 0.493 | 0.003  | 0.014  |
| Transmembrane protein 106A                                                               | BC022145  | 0.493 | 0.001  | 0.005  |
| EST X83313                                                                               | BG065719  | 0.49  | 0.006  | 0.018  |
| ESTs                                                                                     | AI604411  | 0.49  | 0.006  | 0.005  |
| ESTs, Weakly similar to NED4 MOUSE NEDD-4 PROTEIN ( <i>M.musculus</i> )                  | AI593288  | 0.49  | 0.008  | 0.003  |

|                                                                                                       |           |       |        |        |
|-------------------------------------------------------------------------------------------------------|-----------|-------|--------|--------|
| Jumonji, AT rich interactive domain 1C (Rbp2 like)                                                    | BB165753  | 0.49  | 0.013  | 0.033  |
| Rho GTPase activating protein 9                                                                       | AU043488  | 0.49  | 0.007  | 0.006  |
| Shc SH2-domain binding protein 1                                                                      | NM_011369 | 0.49  | 0.002  | 0.006  |
| Sterol O-acyltransferase 1                                                                            | BG064396  | 0.49  | 0.001  | 0.003  |
| Transcribed locus                                                                                     | BB104669  | 0.49  | 0.003  | 0.009  |
| cyclin B1                                                                                             | NM_007629 | 0.488 | 0.002  | 0.016  |
| FERM domain containing 4B                                                                             | BB009122  | 0.488 | 0.001  | 0.009  |
| Fermitin family homolog 3 (Drosophila)                                                                | BG066664  | 0.488 | 0.001  | 0.004  |
| Testis-specific kinase 2                                                                              | BQ179435  | 0.488 | 0.005  | 0.001  |
| Transcribed locus                                                                                     | BB480970  | 0.488 | 0.004  | 0.007  |
| CAP, adenylate cyclase-associated protein 1 (yeast)                                                   | NM_007598 | 0.485 | 0.011  | 0.011  |
| CDNA sequence BC052328                                                                                | BM224662  | 0.485 | 0.001  | 0.007  |
| DBF4 homolog (S. cerevisiae)                                                                          | NM_013726 | 0.485 | 0.001  | 0.004  |
| ESTs                                                                                                  | BG071091  | 0.485 | 0.006  | 0.007  |
| FYN binding protein                                                                                   | BB157866  | 0.485 | 0.001  | 0.001  |
| Mucolipin 2                                                                                           | AK014467  | 0.485 | 0.008  | 0.036  |
| RIKEN cDNA 4921513D23 gene                                                                            | BB123487  | 0.485 | 0.005  | 0.005  |
| RIKEN cDNA 9430034F23 gene                                                                            | AK020456  | 0.485 | 0.013  | 0.036  |
| Transcribed locus                                                                                     | AU020421  | 0.485 | 0.006  | 0.024  |
| Transcribed locus                                                                                     | AW537708  | 0.485 | 0.0001 | 0.003  |
| annexin A6                                                                                            | AK013026  | 0.483 | 0.005  | 0.001  |
| ESTs                                                                                                  | BB373572  | 0.483 | 0.007  | 0.015  |
| PR domain containing 1, with ZNF domain                                                               | NM_007548 | 0.483 | 0.006  | 0.005  |
| T-box 1                                                                                               | AF326960  | 0.483 | 0.002  | 0.022  |
| Dedicator of cyto-kinesis 2                                                                           | NM_033374 | 0.481 | 0.001  | 0.021  |
| ESTs                                                                                                  | BM199910  | 0.481 | 0.003  | 0.003  |
| Heme oxygenase (decycling) 1                                                                          | NM_010442 | 0.481 | 0.0001 | 0.006  |
| Interferon, alpha-inducible protein 27                                                                | AY090098  | 0.481 | 0.001  | 0.007  |
| Leukocyte immunoglobulin-like receptor, subfamily B (with TM and ITIM domains), member 3              | U96693    | 0.481 | 0.002  | 0.004  |
| Liver glycogen phosphorylase                                                                          | NM_133198 | 0.481 | 0.001  | 0.001  |
| RIKEN cDNA 2310045N14 gene                                                                            | AK009831  | 0.481 | 0.002  | 0.016  |
| RIKEN cDNA A230054D04 gene                                                                            | BB542960  | 0.481 | 0.004  | 0.039  |
| Transcribed locus                                                                                     | BB235876  | 0.481 | 0.004  | 0.003  |
| Transcribed locus                                                                                     | BM244144  | 0.481 | 0.006  | 0.004  |
| Transcribed locus                                                                                     | BB753814  | 0.481 | 0.01   | 0.012  |
| Transcribed locus, strongly similar to NP_780438.2 serine/arginine repetitive matrix 2 [Mus musculus] | BB821417  | 0.481 | 0.003  | 0.0001 |
| Baculoviral IAP repeat-containing 6                                                                   | BB527646  | 0.478 | 0.007  | 0.005  |
| Cytoskeleton-associated protein 4                                                                     | BB312117  | 0.478 | 0.001  | 0.0001 |
| Dynactin 5                                                                                            | NM_011121 | 0.478 | 0.003  | 0.034  |
| Interferon induced transmembrane protein 1                                                            | BC027285  | 0.478 | 0.002  | 0.025  |
| Receptor (calcitonin) activity modifying protein 2                                                    | AF146523  | 0.478 | 0.0001 | 0.014  |
| Rho GTPase activating protein 17                                                                      | BB749468  | 0.478 | 0.005  | 0.041  |
| CD300 antigen like family member B                                                                    | BB230267  | 0.476 | 0.002  | 0.004  |
| Epidermal growth factor receptor pathway substrate 8                                                  | NM_007945 | 0.476 | 0.001  | 0.0001 |
| lysosomal-associated protein transmembrane 5                                                          | BB218107  | 0.476 | 0.0001 | 0.001  |
| SERTA domain containing 4                                                                             | BQ174721  | 0.476 | 0.002  | 0.009  |
| Transcribed locus                                                                                     | BG076154  | 0.476 | 0.003  | 0.008  |
| Adipose differentiation related protein                                                               | NM_007408 | 0.474 | 0.0001 | 0.003  |

|                                                                                            |           |       |        |        |
|--------------------------------------------------------------------------------------------|-----------|-------|--------|--------|
| Chitinase 3-like 3                                                                         | NM_009892 | 0.474 | 0.001  | 0.038  |
| Collagen, type XII, alpha 1                                                                | AW412729  | 0.474 | 0.004  | 0.014  |
| Coronin, actin binding protein 1A                                                          | BB740218  | 0.474 | 0.001  | 0.007  |
| ESTs                                                                                       | BG075224  | 0.474 | 0.01   | 0.045  |
| Fc receptor, IgE, high affinity I, gamma polypeptide                                       | NM_010185 | 0.474 | 0.0001 | 0.002  |
| Transcribed locus                                                                          | BB202321  | 0.474 | 0.016  | 0.032  |
| Transcribed locus                                                                          | C85455    | 0.474 | 0.005  | 0.015  |
| Tropomyosin 1, alpha                                                                       | BM232388  | 0.474 | 0.001  | 0.008  |
| ESTs                                                                                       | BB039073  | 0.472 | 0.006  | 0.017  |
| Solute carrier family 25, member 30                                                        | BB032012  | 0.472 | 0.002  | 0.001  |
| Transcribed locus                                                                          | AI606033  | 0.472 | 0.005  | 0.031  |
| Transcribed locus                                                                          | AV330236  | 0.472 | 0.01   | 0.014  |
| Transcribed locus                                                                          | BM243379  | 0.472 | 0.001  | 0.001  |
| Twinfilin, actin-binding protein, homolog 1 (Drosophila)                                   | BI662615  | 0.472 | 0.003  | 0.026  |
| Mus musculus, Similar to transgelin 2, clone MGC:6300<br>IMAGE:2654381, mRNA, complete cds | AV212626  | 0.469 | 0.001  | 0.023  |
| Coiled-coil domain containing 109B                                                         | NM_025779 | 0.467 | 0.002  | 0.007  |
| Complement component 3a receptor 1                                                         | NM_009779 | 0.467 | 0.0001 | 0.002  |
| Membrane-spanning 4-domains, subfamily A, member 6B                                        | NM_027209 | 0.467 | 0.0001 | 0.002  |
| Regulator of G-protein signaling 18                                                        | BB139986  | 0.467 | 0.006  | 0.02   |
| RIKEN cDNA A630042L21 gene                                                                 | BB233267  | 0.467 | 0.006  | 0.002  |
| Transcribed locus                                                                          | BF715043  | 0.467 | 0.001  | 0.0001 |
| Transcribed locus                                                                          | BB051012  | 0.467 | 0.011  | 0.022  |
| Transcribed locus                                                                          | BG094104  | 0.467 | 0.005  | 0.002  |
| Transcribed locus                                                                          | BB433596  | 0.467 | 0.007  | 0.023  |
| CD52 antigen                                                                               | NM_013706 | 0.465 | 0.0001 | 0.005  |
| Deoxycytidine kinase                                                                       | BB030204  | 0.465 | 0.001  | 0.005  |
| Epidermal growth factor-containing fibulin-like extracellular matrix<br>protein 1          | BC023060  | 0.465 | 0.001  | 0.004  |
| expressed sequence AV025504                                                                | BB115446  | 0.465 | 0.001  | 0.001  |
| Nuclear transcription factor, X-box binding-like 1                                         | NM_133921 | 0.465 | 0.002  | 0.011  |
| Transcribed locus                                                                          | BM203526  | 0.465 | 0.005  | 0.021  |
| High mobility group AT-hook 2                                                              | BB105328  | 0.463 | 0.016  | 0.001  |
| RAP2B, member of RAS oncogene family                                                       | BB390705  | 0.463 | 0.003  | 0.001  |
| Transcribed locus                                                                          | BG074304  | 0.463 | 0.006  | 0.006  |
| UDP-Gal:betaGlcNAc beta 1,4-galactosyltransferase, polypeptide<br>6                        | BG066773  | 0.463 | 0.001  | 0.001  |
| Bone marrow stromal cell antigen 1                                                         | AI647987  | 0.461 | 0.005  | 0.007  |
| Platelet-derived growth factor, C polypeptide                                              | NM_019971 | 0.461 | 0.003  | 0.02   |
| RIKEN cDNA 4930506M07 gene                                                                 | BB559293  | 0.461 | 0.002  | 0.0001 |
| RIKEN cDNA 4932415G12 gene                                                                 | AK015136  | 0.461 | 0.018  | 0.039  |
| Signal sequence receptor, gamma                                                            | AU022074  | 0.461 | 0.0001 | 0.039  |
| toll-like receptor 13                                                                      | BI655907  | 0.461 | 0.001  | 0.012  |
| Chemokine (C-C motif) ligand 9                                                             | AF128196  | 0.459 | 0.0001 | 0.01   |
| EST                                                                                        | AV084904  | 0.459 | 0.0001 | 0.002  |
| ESTs                                                                                       | BG075606  | 0.459 | 0.007  | 0.013  |
| Sperm associated antigen 5                                                                 | BM208112  | 0.459 | 0.011  | 0.004  |
| Transcribed locus                                                                          | BB827631  | 0.459 | 0.003  | 0.003  |
| Transcribed locus                                                                          | BF165681  | 0.459 | 0.002  | 0.005  |
| ESTs                                                                                       | BB425118  | 0.457 | 0.014  | 0.027  |

|                                                                                                                               |           |       |        |        |
|-------------------------------------------------------------------------------------------------------------------------------|-----------|-------|--------|--------|
| ESTs, Weakly similar to JAK3 MOUSE TYROSINE-PROTEIN KINASE JAK3 (M.musculus)                                                  | BG063073  | 0.457 | 0.012  | 0.005  |
| Kinesin family member 2C                                                                                                      | NM_134471 | 0.457 | 0.005  | 0.005  |
| Transcribed locus                                                                                                             | BE690666  | 0.457 | 0.01   | 0.005  |
| 5-hydroxytryptamine (serotonin) receptor 2B                                                                                   | NM_008311 | 0.455 | 0.006  | 0.022  |
| ESTs                                                                                                                          | AU040352  | 0.455 | 0.007  | 0.003  |
| ESTs                                                                                                                          | AV369290  | 0.455 | 0.009  | 0.002  |
| RIKEN cDNA 6330500D04 gene                                                                                                    | AV329070  | 0.455 | 0.006  | 0.004  |
| Solute carrier family 15, member 3                                                                                            | NM_023044 | 0.455 | 0.002  | 0.05   |
| Asp (abnormal spindle)-like, microcephaly associated (Drosophila)                                                             | NM_009791 | 0.452 | 0.003  | 0.001  |
| Deleted in lymphocytic leukemia, 2                                                                                            | AA189481  | 0.452 | 0.007  | 0.009  |
| DNA segment, Chr 10, ERATO Doi 276, expressed                                                                                 | BG066654  | 0.452 | 0.008  | 0.029  |
| ESTs, Weakly similar to GNMSLL retrovirus-related reverse transcriptase homolog - mouse retrotransposon (M.musculus)          | AI506532  | 0.452 | 0.003  | 0.012  |
| Phosphatidylinositol-5-phosphate 4-kinase, type II, alpha                                                                     | AK012196  | 0.452 | 0.003  | 0.001  |
| Protein phosphatase 1H (PP2C domain containing)                                                                               | AU040848  | 0.452 | 0.003  | 0.001  |
| Structural maintenance of chromosomes 6                                                                                       | BB056038  | 0.452 | 0.012  | 0.001  |
| Z-DNA binding protein 1                                                                                                       | AK008179  | 0.452 | 0.005  | 0.019  |
| Zwilch, kinetochore associated, homolog (Drosophila)                                                                          | BC027435  | 0.452 | 0.002  | 0.023  |
| ESTs                                                                                                                          | BE980962  | 0.45  | 0.007  | 0.0001 |
| ESTs                                                                                                                          | BB394466  | 0.45  | 0.004  | 0.003  |
| expressed sequence AU015263                                                                                                   | BG070233  | 0.45  | 0.003  | 0.008  |
| Lysosomal acid lipase A                                                                                                       | AI596237  | 0.45  | 0.001  | 0.013  |
| Schlafen 2                                                                                                                    | NM_011408 | 0.45  | 0.001  | 0.011  |
| Transcribed locus                                                                                                             | BF225802  | 0.45  | 0.0001 | 0.002  |
| Ect2 oncogene                                                                                                                 | NM_007900 | 0.448 | 0.002  | 0.003  |
| Topoisomerase (DNA) II alpha                                                                                                  | BB749838  | 0.448 | 0.006  | 0.013  |
| Transcribed locus                                                                                                             | BF147024  | 0.448 | 0.02   | 0.008  |
| growth arrest specific 1 /FL=gb:NM_008086.1                                                                                   | BB550400  | 0.446 | 0.001  | 0.005  |
| Macrophage scavenger receptor 1                                                                                               | L04274    | 0.446 | 0.01   | 0.02   |
| RIKEN cDNA 2310022G15 gene                                                                                                    | BF783360  | 0.446 | 0.003  | 0.015  |
| Transcribed locus                                                                                                             | BI685536  | 0.446 | 0.001  | 0.007  |
| Transcribed locus                                                                                                             | BB229269  | 0.446 | 0.005  | 0.004  |
| Transcribed locus                                                                                                             | AW537708  | 0.446 | 0.003  | 0.025  |
| Fatty acid binding protein 7, brain                                                                                           | NM_021272 | 0.444 | 0.007  | 0.003  |
| Gene model 885, (NCBI)                                                                                                        | BE629676  | 0.444 | 0.004  | 0.004  |
| Neurobeachin like 1                                                                                                           | BB022773  | 0.444 | 0.006  | 0.009  |
| Six transmembrane epithelial antigen of prostate 2                                                                            | AK015015  | 0.444 | 0.004  | 0.017  |
| Thrombospondin 2                                                                                                              | NM_011581 | 0.444 | 0.001  | 0.006  |
| Transcribed locus, strongly similar to XP_141626.3 PREDICTED: similar to Ubiquitin-conjugating enzyme E2Q (putative) 2 [Mus m | AW550321  | 0.444 | 0.006  | 0.015  |
| Cysteinyl leukotriene receptor 1                                                                                              | BC027102  | 0.442 | 0.006  | 0.018  |
| Fc receptor, IgG, high affinity I                                                                                             | AF143181  | 0.442 | 0.001  | 0.008  |
| Thyroid hormone receptor interactor 13                                                                                        | AK010336  | 0.442 | 0.002  | 0.011  |
| Transcribed locus                                                                                                             | BB262899  | 0.442 | 0.017  | 0.047  |
| Cathepsin C                                                                                                                   | BM237633  | 0.439 | 0.004  | 0.007  |
| CD180 antigen                                                                                                                 | NM_008533 | 0.439 | 0.004  | 0.004  |
| C-type lectin domain family 5, member a                                                                                       | NM_021364 | 0.439 | 0.007  | 0.005  |
| Epithelial stromal interaction 1 (breast)                                                                                     | BF020640  | 0.439 | 0.003  | 0.019  |
| Expressed sequence C79407                                                                                                     | BB540053  | 0.439 | 0.005  | 0.002  |

|                                                              |           |       |        |        |
|--------------------------------------------------------------|-----------|-------|--------|--------|
| Kinesin family member 22                                     | BC003427  | 0.439 | 0.006  | 0.02   |
| Myb-like, SWIRM and MPN domains 1                            | BB045598  | 0.439 | 0.009  | 0.047  |
| Discs, large (Drosophila) homolog-associated protein 5       | BM250919  | 0.437 | 0.007  | 0.046  |
| Hyaluronan mediated motility receptor (RHAMM)                | BC021427  | 0.437 | 0.003  | 0.002  |
| Maternal embryonic leucine zipper kinase                     | NM_010790 | 0.437 | 0.003  | 0.048  |
| Transforming growth factor, beta induced                     | NM_009369 | 0.437 | 0.0001 | 0.0001 |
| Pleckstrin                                                   | AF181829  | 0.435 | 0.001  | 0.004  |
| transforming growth factor, beta induced, 68 kDa             | BB533460  | 0.435 | 0.0001 | 0.0001 |
| A disintegrin and metallopeptidase domain 12 (meltrin alpha) | NM_007400 | 0.433 | 0.002  | 0.001  |
| Collagen, type I, alpha 2                                    | BB150460  | 0.433 | 0.008  | 0.009  |
| Transcribed locus                                            | BB490889  | 0.433 | 0.01   | 0.009  |
| Transcribed locus                                            | BB380864  | 0.433 | 0.018  | 0.018  |
| ATPase, class V, type 10A                                    | BM249532  | 0.431 | 0.008  | 0.039  |
| Formin 1                                                     | BB164513  | 0.431 | 0.009  | 0.003  |
| Protein tyrosine phosphatase, receptor type, O               | AF295638  | 0.431 | 0.008  | 0.009  |
| Transcribed locus                                            | BB538816  | 0.431 | 0.006  | 0.008  |
| Baculoviral IAP repeat-containing 5                          | BC004702  | 0.429 | 0.001  | 0.002  |
| Mitogen-activated protein kinase kinase kinase kinase 1      | BB546619  | 0.429 | 0.007  | 0.014  |
| N-acetylneuraminase pyruvate lyase                           | BC022734  | 0.429 | 0.001  | 0.017  |
| TAO kinase 1                                                 | BM238077  | 0.429 | 0.008  | 0.003  |
| Apolipoprotein B editing complex 1                           | BC003792  | 0.427 | 0.001  | 0.005  |
| DNA segment, Chr 10, ERATO Doi 709, expressed                | BG069224  | 0.427 | 0.005  | 0.004  |
| Paternally expressed 3                                       | AB003040  | 0.427 | 0.001  | 0.002  |
| Transcribed locus                                            | BG067008  | 0.427 | 0.006  | 0.006  |
| Transmembrane protein 97                                     | NM_133706 | 0.427 | 0.004  | 0.005  |
| Cyclin A2                                                    | X75483    | 0.426 | 0.001  | 0.002  |
| Hypothetical protein LOC100043636                            | BE688410  | 0.426 | 0.001  | 0.021  |
| Transcribed locus                                            | AV349116  | 0.426 | 0.002  | 0.01   |
| BCL2-like 11 (apoptosis facilitator)                         | BB667581  | 0.424 | 0.001  | 0.001  |
| Exonuclease domain containing 1                              | BB091183  | 0.424 | 0.009  | 0.038  |
| Ribosome binding protein 1                                   | NM_133626 | 0.424 | 0.001  | 0.028  |
| Transcribed locus                                            | BM234702  | 0.424 | 0.005  | 0.032  |
| Transcribed locus                                            | BB070941  | 0.424 | 0.007  | 0.011  |
| Sorting nexin 6                                              | BC025911  | 0.422 | 0.003  | 0.005  |
| Transmembrane protein 100                                    | NM_026433 | 0.422 | 0.001  | 0.046  |
| Tripartite motif-containing 59                               | NM_025863 | 0.422 | 0.003  | 0.018  |
| Complement factor properdin                                  | BB800282  | 0.418 | 0.001  | 0.005  |
| Fidgetin-like 1                                              | NM_021891 | 0.418 | 0.003  | 0.031  |
| Transcribed locus                                            | BG066234  | 0.418 | 0.004  | 0.006  |
| tripartite motif-containing 34                               | AF220142  | 0.418 | 0.003  | 0.029  |
| C-type lectin domain family 4, member a3                     | AK014135  | 0.417 | 0.001  | 0.001  |
| Transcribed locus                                            | BE692425  | 0.417 | 0.002  | 0.003  |
| Disabled homolog 2 (Drosophila)                              | AK017619  | 0.415 | 0.003  | 0.007  |
| promyelocytic leukemia                                       | BB667149  | 0.415 | 0.005  | 0.022  |
| Versican                                                     | BM251152  | 0.415 | 0.003  | 0.002  |
| ESTs                                                         | BB735884  | 0.413 | 0.009  | 0.004  |
| Transcribed locus                                            | BB420529  | 0.413 | 0.003  | 0.002  |
| Embigin                                                      | BG064842  | 0.412 | 0.001  | 0.005  |
| ESTs                                                         | BM123108  | 0.412 | 0.017  | 0.049  |

|                                                                                                                                                                         |           |       |        |        |
|-------------------------------------------------------------------------------------------------------------------------------------------------------------------------|-----------|-------|--------|--------|
| Interferon activated gene 204                                                                                                                                           | NM_008329 | 0.412 | 0.003  | 0.022  |
| Transcribed locus                                                                                                                                                       | BB367687  | 0.412 | 0.007  | 0.005  |
| Transcribed locus, moderately similar to XP_001477892.1<br>PREDICTED: hypothetical protein [Mus musculus]                                                               | BG862223  | 0.412 | 0.003  | 0.008  |
| UDP glucuronosyltransferase 1 family, polypeptide A6B                                                                                                                   | D87867    | 0.412 | 0.0001 | 0.001  |
| E1A binding protein p400                                                                                                                                                | BM236717  | 0.408 | 0.006  | 0.007  |
| RIKEN cDNA 5830411K21 gene                                                                                                                                              | BM220939  | 0.408 | 0.002  | 0.007  |
| Transmembrane protein 8 (five membrane-spanning domains)                                                                                                                | NM_021793 | 0.408 | 0.005  | 0.018  |
| Coagulation factor XIII, A1 subunit                                                                                                                                     | NM_028784 | 0.407 | 0.0001 | 0.002  |
| ESTs, Weakly similar to TYROSINE-PROTEIN KINASE JAK3<br>(M.musculus)                                                                                                    | BB441213  | 0.407 | 0.008  | 0.007  |
| 5-nucleotidase domain containing 2                                                                                                                                      | BC011230  | 0.405 | 0.002  | 0.002  |
| Alport syndrome, mental retardation, midface hypoplasia and<br>elliptocytosis chromosomal region gene 1 homolog (human)                                                 | BM235514  | 0.405 | 0.006  | 0.009  |
| Diaphanous homolog 3 (Drosophila)                                                                                                                                       | NM_019670 | 0.405 | 0.01   | 0.037  |
| ESTs, Weakly similar to phosphatase (Caenorhabditis elegans)<br>(C.elegans)                                                                                             | BG075843  | 0.405 | 0.003  | 0.03   |
| Follistatin                                                                                                                                                             | NM_008046 | 0.405 | 0.005  | 0.036  |
| inner centromere protein                                                                                                                                                | BB418702  | 0.405 | 0.001  | 0.002  |
| ROD1 regulator of differentiation 1 (S. pombe)                                                                                                                          | BB519382  | 0.405 | 0.002  | 0.016  |
| Centromere protein N                                                                                                                                                    | BM230253  | 0.403 | 0.002  | 0.012  |
| IKAROS family zinc finger 1                                                                                                                                             | AV317621  | 0.403 | 0.002  | 0.004  |
| Leukocyte specific transcript 1                                                                                                                                         | U72644    | 0.403 | 0.002  | 0.0001 |
| Transcribed locus                                                                                                                                                       | BM116703  | 0.403 | 0.012  | 0.027  |
| Membrane-spanning 4-domains, subfamily A, member 8A                                                                                                                     | NM_022430 | 0.4   | 0.01   | 0.025  |
| Budding uninhibited by benzimidazoles 1 homolog, beta (S.<br>cerevisiae)                                                                                                | AU045529  | 0.398 | 0.003  | 0.014  |
| Transcribed locus                                                                                                                                                       | BG061923  | 0.397 | 0.003  | 0.006  |
| Colony stimulating factor 3 receptor (granulocyte)                                                                                                                      | NM_007782 | 0.395 | 0.002  | 0.004  |
| C-type lectin domain family 4, member d                                                                                                                                 | NM_010819 | 0.395 | 0.001  | 0.007  |
| RIKEN cDNA E130016E03 gene                                                                                                                                              | AW547464  | 0.395 | 0.022  | 0.032  |
| Schlafen 8                                                                                                                                                              | BC024709  | 0.395 | 0.006  | 0.039  |
| RIKEN cDNA 4930428B01 gene                                                                                                                                              | BB167877  | 0.394 | 0.008  | 0.013  |
| Transcribed locus, strongly similar to NP_033509.1 ubiquitously<br>transcribed tetratricopeptide repeat gene, X chromosome [Mus<br>Zinc finger E-box binding homeobox 2 | BB306686  | 0.394 | 0.014  | 0.014  |
| RIKEN cDNA 4831429J16 gene                                                                                                                                              | NM_015753 | 0.394 | 0.001  | 0.003  |
| RIKEN cDNA 4831429J16 gene                                                                                                                                              | BB702047  | 0.392 | 0.001  | 0.005  |
| Toll-like receptor 1                                                                                                                                                    | AF316985  | 0.392 | 0.003  | 0.004  |
| Mannose receptor, C type 1                                                                                                                                              | NM_008625 | 0.391 | 0.0001 | 0.002  |
| WW domain containing adaptor with coiled-coil                                                                                                                           | BM240080  | 0.391 | 0.003  | 0.015  |
| Transcribed locus                                                                                                                                                       | BB460274  | 0.389 | 0.009  | 0.005  |
| Meteorin, glial cell differentiation regulator-like                                                                                                                     | BB544962  | 0.386 | 0.009  | 0.015  |
| T-box18                                                                                                                                                                 | AK012980  | 0.386 | 0.004  | 0.015  |
| Transcribed locus                                                                                                                                                       | BB236216  | 0.386 | 0.003  | 0.008  |
| ESTs                                                                                                                                                                    | BE853428  | 0.385 | 0.006  | 0.004  |
| RIKEN cDNA 0610025L06 gene                                                                                                                                              | AV010467  | 0.385 | 0.001  | 0.0001 |
| CD244 natural killer cell receptor 2B4                                                                                                                                  | NM_018729 | 0.382 | 0.007  | 0.005  |
| Ecotropic viral integration site 2a                                                                                                                                     | A1122415  | 0.382 | 0.002  | 0.001  |
| RNA binding motif protein 47                                                                                                                                            | BB400564  | 0.382 | 0.004  | 0.031  |
| CD5 antigen-like                                                                                                                                                        | NM_009690 | 0.379 | 0.005  | 0.003  |



|                                                                                           |           |       |        |        |
|-------------------------------------------------------------------------------------------|-----------|-------|--------|--------|
| kit oncogene                                                                              | X65997    | 0.379 | 0.005  | 0.048  |
| Dermatan sulfate epimerase                                                                | BM207218  | 0.377 | 0.002  | 0.002  |
| RIKEN cDNA 6720463M24 gene                                                                | AK020138  | 0.375 | 0.008  | 0.016  |
| ESTs                                                                                      | BB462614  | 0.372 | 0.009  | 0.036  |
| Transmembrane protein 176A                                                                | AU040201  | 0.372 | 0.003  | 0.008  |
| WNT1 inducible signaling pathway protein 2                                                | NM_016873 | 0.372 | 0.002  | 0.0001 |
| ESTs                                                                                      | A1785329  | 0.368 | 0.011  | 0.023  |
| Transcribed locus                                                                         | BB455909  | 0.368 | 0.004  | 0.0001 |
| Membrane-spanning 4-domains, subfamily A, member 6D                                       | NM_026835 | 0.366 | 0.001  | 0.002  |
| Signal-regulatory protein beta 1                                                          | A1662854  | 0.365 | 0.001  | 0.0001 |
| Structural maintenance of chromosomes 2                                                   | B1684556  | 0.365 | 0.007  | 0.0001 |
| Chemokine (C-C motif) receptor 5                                                          | D83648    | 0.364 | 0.001  | 0.004  |
| Latent transforming growth factor beta binding protein 2                                  | NM_013589 | 0.364 | 0.002  | 0.001  |
| MARCKS-like 1                                                                             | NM_010807 | 0.362 | 0.002  | 0.031  |
| Transcribed locus                                                                         | BB336138  | 0.362 | 0.006  | 0.01   |
| Transcribed locus                                                                         | BM241342  | 0.361 | 0.003  | 0.021  |
| Vav 1 oncogene                                                                            | NM_011691 | 0.361 | 0.004  | 0.001  |
| Zinc finger CCCH type containing 12D                                                      | BB508669  | 0.361 | 0.007  | 0.004  |
| Transcribed locus                                                                         | BB468551  | 0.358 | 0.005  | 0.005  |
| ESTs                                                                                      | BM240056  | 0.357 | 0.012  | 0.001  |
| RIKEN cDNA 4930547N16 gene                                                                | BM205349  | 0.357 | 0.011  | 0.027  |
| Glucosaminyl (N-acetyl) transferase 1, core 2                                             | AK017462  | 0.356 | 0.003  | 0.0001 |
| ESTs                                                                                      | BB147698  | 0.351 | 0.006  | 0.001  |
| Chemokine (C-X-C motif) ligand 12                                                         | BC006640  | 0.348 | 0.0001 | 0.01   |
| C-type lectin domain family 4, member n                                                   | AF240358  | 0.348 | 0.006  | 0.011  |
| Mus musculus, clone IMAGE:3492506, mRNA, partial cds                                      | AW763751  | 0.345 | 0.004  | 0.01   |
| Transmembrane and coiled coil domains 1                                                   | BB470329  | 0.342 | 0.014  | 0.029  |
| Fc receptor-like S, scavenger receptor                                                    | BC016551  | 0.341 | 0.001  | 0.0001 |
| Interferon induced transmembrane protein 6                                                | BB193024  | 0.341 | 0.003  | 0.003  |
| Interleukin 1 receptor, type I                                                            | NM_008362 | 0.34  | 0.001  | 0.0001 |
| RIKEN cDNA 8430436C05 gene                                                                | AU016566  | 0.339 | 0.004  | 0.005  |
| Similar to SIRP beta 1 cell surface protein                                               | BB224524  | 0.338 | 0.002  | 0.005  |
| C-type lectin domain family 4, member a2                                                  | BC006623  | 0.337 | 0.001  | 0.001  |
| Kinesin family member 20B                                                                 | BB200034  | 0.337 | 0.004  | 0.0001 |
| hematological and neurological expressed sequence 1                                       | AV067695  | 0.336 | 0.0001 | 0.04   |
| ribonuclease L (2, 5-oligoisoadenylate synthetase-dependent)                              | BF714880  | 0.333 | 0.002  | 0.002  |
| Serine/threonine kinase 17b (apoptosis-inducing)                                          | A1661948  | 0.333 | 0.007  | 0.012  |
| Immunoglobulin superfamily, member 6                                                      | NM_030691 | 0.33  | 0.002  | 0.001  |
| ESTs                                                                                      | AW909042  | 0.329 | 0.009  | 0.004  |
| Allograft inflammatory factor 1                                                           | NM_019467 | 0.325 | 0.001  | 0.004  |
| Transcribed locus                                                                         | BM239436  | 0.325 | 0.008  | 0.009  |
| Insulin-like growth factor binding protein 5                                              | NM_010518 | 0.324 | 0.001  | 0.0001 |
| CD163 antigen                                                                             | NM_053094 | 0.323 | 0.001  | 0.034  |
| Potassium intermediate/small conductance calcium-activated channel, subfamily N, member 4 | BG865910  | 0.321 | 0.001  | 0.012  |
| G-protein coupled receptor 65                                                             | NM_008152 | 0.316 | 0.003  | 0.0001 |
| Mus musculus growth arrest specific 1 (Gas1), mRNA.                                       | BB550400  | 0.312 | 0.0001 | 0.005  |
| Chemokine (C-C motif) ligand 12                                                           | U50712    | 0.307 | 0.003  | 0.013  |
| ESTs                                                                                      | BB488200  | 0.306 | 0.003  | 0.006  |
| C-type lectin domain family 4, member e                                                   | NM_019948 | 0.304 | 0.004  | 0.011  |

|                                                                                |           |       |       |        |
|--------------------------------------------------------------------------------|-----------|-------|-------|--------|
| Pro-platelet basic protein                                                     | NM_023785 | 0.303 | 0.003 | 0.004  |
| Epstein-Barr virus induced gene 2                                              | BM242490  | 0.301 | 0.003 | 0.003  |
| Chemokine (C-C motif) receptor 2                                               | BB148128  | 0.299 | 0.001 | 0.001  |
| TBC1 domain family, member 9                                                   | BE853276  | 0.294 | 0.008 | 0.037  |
| Membrane-spanning 4-domains, subfamily A, member 4C                            | NM_029499 | 0.293 | 0.002 | 0.003  |
| Placenta-specific 8                                                            | AF263458  | 0.289 | 0.001 | 0.003  |
| Transcribed locus                                                              | BB183534  | 0.284 | 0.003 | 0.001  |
| ESTs                                                                           | BB040443  | 0.281 | 0.002 | 0.009  |
| Protein kinase, cAMP dependent regulatory, type II beta                        | BB216074  | 0.275 | 0.005 | 0.023  |
| Transcribed locus                                                              | BE632903  | 0.275 | 0.008 | 0.022  |
| RIKEN cDNA 2900062L11 gene                                                     | AK013740  | 0.273 | 0.012 | 0.034  |
| S100 calcium binding protein A8 (calgranulin A)                                | NM_013650 | 0.261 | 0.001 | 0.001  |
| Collagen and calcium binding EGF domains 1                                     | BB197647  | 0.258 | 0.007 | 0.002  |
| Cytochrome P450, family 1, subfamily b, polypeptide 1                          | BI251808  | 0.253 | 0.002 | 0.003  |
| Chemokine (C-C motif) ligand 8                                                 | NM_021443 | 0.222 | 0.001 | 0.029  |
| Transcribed locus                                                              | BB205102  | 0.206 | 0.01  | 0.01   |
| Formyl peptide receptor 2                                                      | NM_008039 | 0.198 | 0.005 | 0.0001 |
| Matrix metallopeptidase 9                                                      | NM_013599 | 0.198 | 0.004 | 0.001  |
| S100 calcium binding protein A9 (calgranulin B)                                | NM_009114 | 0.195 | 0.001 | 0.001  |
| Schlafen 4                                                                     | AF099975  | 0.195 | 0.002 | 0.001  |
| Mus musculus membrane-spanning 4-domains, subfamily A, member 9 (Ms4a9), mRNA. | NM_022429 | 0.192 | 0.002 | 0.001  |
| DEXH (Asp-Glu-X-His) box polypeptide 58                                        | AF316999  | 0.189 | 0.013 | 0.045  |
| hypothetical protein LOC215866                                                 | BC002257  | 0.173 | 0.004 | 0.026  |
| Chemokine (C-X-C motif) ligand 5                                               | NM_009141 | 0.128 | 0.003 | 0.01   |
| Secreted frizzled-related protein 2                                            | NM_009144 | 0.128 | 0.001 | 0.0001 |
| ESTs                                                                           | BB160675  | 0.083 | 0.047 | 0.04   |
| ESTs                                                                           | AU019852  | 0.074 | 0.017 | 0.0001 |
| Cell adhesion molecule with homology to L1CAM                                  | NM_007697 | 0.073 | 0.023 | 0.002  |
| Transient receptor potential cation channel, subfamily M, member 3             | BB377721  | 0.059 | 0.032 | 0.001  |
| Membrane-spanning 4-domains, subfamily A, member 4B                            | BB199001  | 0.051 | 0.033 | 0.026  |
