# Supplementary material
Source: PubMed Central journal article supplement (PMC4599788)
Supplement: NIHMS168497-supplement-02.pdf [file NIHMS168497-supplement-02.pdf]

**Table S2: Differentially expressed genes at day 7 of nitrite therapy**

| Gene Name                                                                                                            | Accession # | ratio | SEM   | P Value |
|----------------------------------------------------------------------------------------------------------------------|-------------|-------|-------|---------|
| Matrix metalloproteinase 13                                                                                          | NM_008607   | 47.04 | 0.064 | 0.047   |
| Secreted frizzled-related protein 2                                                                                  | NM_009144   | 16.54 | 0.034 | 0.033   |
| Chemokine (C-C motif) ligand 8                                                                                       | NM_021443   | 12.03 | 0.012 | 0.032   |
| RIKEN cDNA 1500015O10 gene                                                                                           | BB426248    | 10.41 | 0.026 | 0.024   |
| Complement component 2 (within H-2S)                                                                                 | NM_013484   | 8.98  | 0.046 | 0.005   |
| Paired related homeobox 2                                                                                            | AK019971    | 8.9   | 0.064 | 0.049   |
| Matrix metalloproteinase 3                                                                                           | NM_010809   | 7.88  | 0.032 | 0.031   |
| Adiponectin, C1Q and collagen domain containing                                                                      | NM_009605   | 7.84  | 0.003 | 0.017   |
| Collagen triple helix repeat containing 1                                                                            | AK003674    | 7.82  | 0.007 | 0.045   |
| CDNA sequence AB124611                                                                                               | BM246462    | 7.3   | 0.037 | 0.043   |
| Lymphocyte cytosolic protein 2                                                                                       | BC006948    | 6.28  | 0.038 | 0.041   |
| Proteoglycan 4 (megakaryocyte stimulating factor, articular superficial zone protein)                                | NM_021400   | 5.96  | 0.003 | 0.023   |
| Perilipin                                                                                                            | BB144871    | 5.71  | 0.021 | 0.036   |
| Chondroadherin                                                                                                       | NM_007689   | 5.62  | 0.008 | 0.021   |
| ESTs                                                                                                                 | BG067883    | 5.49  | 0.057 | 0.003   |
| expressed sequence AW743884                                                                                          | BB114398    | 5.45  | 0.007 | 0.045   |
| Phosphoenolpyruvate carboxykinase 1, cytosolic                                                                       | AW106963    | 5.29  | 0.023 | 0.025   |
| Sushi-repeat-containing protein, X-linked 2                                                                          | BC028307    | 5.23  | 0.01  | 0.049   |
| Protein tyrosine phosphatase, receptor type, O                                                                       | NM_011216   | 5.12  | 0.017 | 0.021   |
| CD52 antigen                                                                                                         | NM_013706   | 5.08  | 0.006 | 0.045   |
| PYD and CARD domain containing                                                                                       | BG084230    | 4.97  | 0.013 | 0.048   |
| expressed sequence AI323359                                                                                          | AI323359    | 4.84  | 0.004 | 0.046   |
| Twist gene homolog 1 (Drosophila)                                                                                    | NM_011658   | 4.77  | 0.044 | 0.04    |
| Protein tyrosine phosphatase, receptor type, F                                                                       | BF235516    | 4.76  | 0.015 | 0.038   |
| Transcribed locus                                                                                                    | AV223337    | 4.64  | 0.031 | 0.008   |
| Integrin, beta-like 1                                                                                                | BC020152    | 4.54  | 0.004 | 0.003   |
| Thrombospondin 1                                                                                                     | AI385532    | 4.44  | 0.002 | 0.038   |
| Collagen, type XI, alpha 1                                                                                           | NM_007729   | 4.43  | 0.011 | 0.018   |
| Coiled-coil domain containing 80                                                                                     | BG074158    | 4.38  | 0.007 | 0.011   |
| Complement component 4B (Childo blood group)                                                                         | NM_009780   | 4.34  | 0.005 | 0.026   |
| Angiopoietin-like 7                                                                                                  | BC023373    | 4.27  | 0.005 | 0.035   |
| Solute carrier family 41, member 2                                                                                   | BC026874    | 4.24  | 0.026 | 0.018   |
| Fatty acid desaturase 3                                                                                              | BE652876    | 4.24  | 0.02  | 0.025   |
| Terf1 (TRF1)-interacting nuclear factor 2                                                                            | BM238063    | 4.19  | 0.039 | 0.018   |
| Transcribed locus                                                                                                    | AK012530    | 4.05  | 0.024 | 0.006   |
| Cell death-inducing DFFA-like effector c                                                                             | BB221402    | 3.99  | 0.02  | 0.01    |
| Alport syndrome, mental retardation, midface hypoplasia and elliptocytosis chromosomal region gene 1 homolog (human) | BM235514    | 3.95  | 0.034 | 0.046   |
| Stearoyl-Coenzyme A desaturase 1                                                                                     | NM_009127   | 3.94  | 0.001 | 0.049   |
| Parathyroid hormone receptor 1                                                                                       | BC013446    | 3.89  | 0.024 | 0.033   |
| Transcribed locus                                                                                                    | BB631473    | 3.8   | 0.031 | 0.011   |
| Transcribed locus                                                                                                    | AV341509    | 3.8   | 0.027 | 0.013   |
| fibromodulin                                                                                                         | AV290700    | 3.76  | 0.003 | 0.009   |
| 3-phosphoglycerate dehydrogenase                                                                                     | AA561726    | 3.68  | 0.011 | 0.027   |
| Transcribed locus                                                                                                    | BB549310    | 3.64  | 0.022 | 0.041   |
| Leukocyte-associated Ig-like receptor 1                                                                              | AK017222    | 3.64  | 0.021 | 0.04    |

|                                                                              |           |      |        |       |
|------------------------------------------------------------------------------|-----------|------|--------|-------|
| Tenomodulin                                                                  | AF291655  | 3.63 | 0.001  | 0.03  |
| Matrix metalloproteinase 14 (membrane-inserted)                              | NM_008608 | 3.53 | 0.001  | 0.05  |
| Fibulin 1                                                                    | NM_010180 | 3.43 | 0.014  | 0.038 |
| Nuclear receptor binding protein 2                                           | BC012437  | 3.42 | 0.008  | 0.023 |
| Interferon, alpha-inducible protein 27                                       | AY090098  | 3.32 | 0.002  | 0.005 |
| Tumor necrosis factor, alpha-induced protein 8                               | NM_134131 | 3.31 | 0.009  | 0.044 |
| Transcribed locus                                                            | BB164127  | 3.28 | 0.019  | 0.049 |
| Protein kinase, cAMP dependent regulatory, type II beta                      | BB216074  | 3.28 | 0.015  | 0.021 |
| phosphatidylethanolamine binding protein 1                                   | AK008037  | 3.28 | 0.03   | 0.049 |
| RIKEN cDNA 120002N14 gene                                                    | BC021433  | 3.27 | 0.006  | 0.043 |
| KDEL (Lys-Asp-Glu-Leu) endoplasmic reticulum protein retention receptor 3    | NM_134090 | 3.25 | 0.005  | 0.046 |
| LIM domain and actin binding 1                                               | C81400    | 3.14 | 0.004  | 0.027 |
| Fatty acid desaturase 2                                                      | NM_019699 | 3.12 | 0.016  | 0.022 |
| Chemokine (C-X-C motif) ligand 9                                             | NM_008599 | 3.11 | 0.008  | 0.017 |
| G-protein signalling modulator 2 (AGS3-like, C. elegans)                     | BC021308  | 3.1  | 0.01   | 0.044 |
| RIKEN cDNA E130112L23 gene                                                   | BI412259  | 3.08 | 0.013  | 0.009 |
| Nicotinamide N-methyltransferase                                             | AK006371  | 3.08 | 0.005  | 0.038 |
| Leucine-rich repeat kinase 1                                                 | BC027199  | 3.08 | 0.007  | 0.035 |
| Prostaglandin I2 (prostacyclin) synthase                                     | NM_008968 | 3.06 | 0.005  | 0.001 |
| Receptor (TNFRSF)-interacting serine-threonine kinase 1                      | AA186144  | 3.05 | 0.009  | 0.039 |
| Interferon regulatory factor 7                                               | NM_016850 | 3.05 | 0.005  | 0.022 |
| Transferrin                                                                  | AF440692  | 3.04 | 0.003  | 0.028 |
| RIKEN cDNA 2610528G05 gene                                                   | BB530515  | 3.02 | 0.003  | 0.025 |
| Transcribed locus                                                            | BB420529  | 3.01 | 0.018  | 0.042 |
| Ras association (RalGDS/AF-6) domain family member 2                         | AK018504  | 2.99 | 0.013  | 0.042 |
| ESTs                                                                         | AU067733  | 2.97 | 0.026  | 0.027 |
| Adenomatous polyposis coli down-regulated 1                                  | BB770932  | 2.96 | 0.015  | 0.005 |
| Interleukin 2 receptor, gamma chain                                          | L20048    | 2.95 | 0.005  | 0.039 |
| DCN1, defective in cullin neddylation 1, domain containing 5 (S. cerevisiae) | BE824946  | 2.92 | 0.027  | 0.014 |
| Myosin IXb                                                                   | NM_015742 | 2.91 | 0.006  | 0.031 |
| Collagen, type I, alpha 2                                                    | BF227507  | 2.91 | 0.0001 | 0.031 |
| Connective tissue growth factor                                              | NM_010217 | 2.89 | 0.001  | 0.03  |
| Solute carrier family 39 (metal ion transporter), member 6                   | BB825002  | 2.86 | 0.005  | 0.036 |
| RIKEN cDNA 9030425E11 gene                                                   | BG072972  | 2.84 | 0.006  | 0.033 |
| Adenosine monophosphate deaminase 2 (isoform L)                              | AV330806  | 2.84 | 0.009  | 0.043 |
| tropomyosin 3, gamma                                                         | AV311925  | 2.81 | 0.008  | 0.037 |
| Ring finger protein 26                                                       | BC004739  | 2.8  | 0.011  | 0.018 |
| RIKEN cDNA 2610002J02 gene                                                   | AV218922  | 2.8  | 0.01   | 0.032 |
| Collagen, type XXIII, alpha 1                                                | AI429655  | 2.79 | 0.014  | 0.036 |
| Biglycan                                                                     | BC019502  | 2.76 | 0.0001 | 0.049 |
| Ceramide kinase                                                              | BI905090  | 2.75 | 0.009  | 0.044 |
| ATPase, class V, type 10A                                                    | BM249532  | 2.75 | 0.025  | 0.02  |
| Myosin IE                                                                    | AK018649  | 2.74 | 0.007  | 0.038 |
| Ring finger protein 135                                                      | AK010429  | 2.67 | 0.012  | 0.026 |

|                                                                            |           |      |        |        |
|----------------------------------------------------------------------------|-----------|------|--------|--------|
| RIKEN cDNA 3321401G04 gene                                                 | BF228051  | 2.67 | 0.017  | 0.033  |
| ESTs                                                                       | BM220188  | 2.67 | 0.033  | 0.046  |
| ABI gene family, member 3 (NESH) binding protein                           | BC026627  | 2.67 | 0.003  | 0.03   |
| Serine (or cysteine) peptidase inhibitor, clade B, member 1a               | AF426024  | 2.66 | 0.002  | 0.048  |
| Microtubule associated monooxygenase, calponin and LIM domain containing 1 | NM_138315 | 2.65 | 0.012  | 0.032  |
| Caspase 4, apoptosis-related cysteine peptidase                            | NM_007609 | 2.65 | 0.014  | 0.033  |
| Transcribed locus                                                          | BM951910  | 2.64 | 0.01   | 0.028  |
| SPC24, NDC80 kinetochore complex component, homolog (S. cerevisiae)        | BF577722  | 2.63 | 0.021  | 0.028  |
| Transcribed locus                                                          | AI481392  | 2.62 | 0.015  | 0.01   |
| Transcribed locus                                                          | BF662057  | 2.61 | 0.008  | 0.047  |
| Matrix metallopeptidase 2                                                  | BF147716  | 2.61 | 0.001  | 0.04   |
| Guanine nucleotide binding protein (G protein), alpha inhibiting 1         | BQ174580  | 2.61 | 0.007  | 0.0001 |
| Solute carrier family 1 (neutral amino acid transporter), member 5         | NM_009201 | 2.6  | 0.003  | 0.03   |
| G-protein signalling modulator 1 (AGS3-like, C. elegans)                   | BC026486  | 2.59 | 0.018  | 0.042  |
| Serine (or cysteine) peptidase inhibitor, clade F, member 1                | NM_011340 | 2.58 | 0.0001 | 0.026  |
| ESTs                                                                       | BB017018  | 2.58 | 0.019  | 0.002  |
| Forkhead box P1                                                            | BG962849  | 2.57 | 0.012  | 0.049  |
| CD163 antigen                                                              | NM_053094 | 2.57 | 0.006  | 0.008  |
| Cardiotrophin-like cytokine factor 1                                       | BB825816  | 2.57 | 0.033  | 0.031  |
| Frizzled homolog 2 (Drosophila)                                            | BB371406  | 2.56 | 0.008  | 0.043  |
| RIKEN cDNA 1110018H23 gene                                                 | AK003777  | 2.55 | 0.011  | 0.04   |
| Endothelin receptor type A                                                 | AW558570  | 2.55 | 0.01   | 0.04   |
| Amine oxidase, copper containing 3                                         | NM_009675 | 2.52 | 0.004  | 0.042  |
| Immunoglobulin superfamily, member 8                                       | AF411055  | 2.51 | 0.005  | 0.028  |
| Granulin                                                                   | AV166504  | 2.5  | 0.0001 | 0.045  |
| S-phase kinase-associated protein 2 (p45)                                  | AV259620  | 2.49 | 0.017  | 0.01   |
| Mitochondrial ribosomal protein S6                                         | BM729431  | 2.49 | 0.004  | 0.005  |
| Kruppel-like factor 16                                                     | NM_078477 | 2.48 | 0.013  | 0.013  |
| Tubulin, beta 5                                                            | BG064086  | 2.47 | 0.003  | 0.05   |
| ESTs                                                                       | AW553802  | 2.47 | 0.017  | 0.044  |
| Prickle-like 2 (Drosophila)                                                | BQ177191  | 2.45 | 0.01   | 0.007  |
| MAM domain containing 2                                                    | AK004794  | 2.45 | 0.006  | 0.038  |
| Septin 5                                                                   | AF033350  | 2.44 | 0.007  | 0.024  |
| Transcribed locus                                                          | BB275943  | 2.43 | 0.002  | 0.021  |
| Cell division cycle associated 4                                           | AF322238  | 2.43 | 0.006  | 0.033  |
| Echinoderm microtubule associated protein like 5                           | BB650819  | 2.42 | 0.022  | 0.045  |
| Procollagen C-endopeptidase enhancer protein                               | BB250811  | 2.41 | 0.0001 | 0.039  |
| CDNA sequence BC023892                                                     | BE687858  | 2.41 | 0.005  | 0.034  |
| Wnt inhibitory factor 1                                                    | BC004048  | 2.4  | 0.022  | 0.009  |
| Transmembrane protein 206                                                  | NM_025864 | 2.4  | 0.02   | 0.028  |
| Keratocan                                                                  | NM_008438 | 2.39 | 0.004  | 0.019  |
| Neurobeachin like 1                                                        | BB022773  | 2.38 | 0.015  | 0.024  |
| Interferon activated gene 204                                              | NM_008329 | 2.38 | 0.015  | 0.037  |
| S100 calcium binding protein A10 (calpactin)                               | AV295650  | 2.37 | 0.001  | 0.033  |

|                                                                                                     |           |      |       |       |
|-----------------------------------------------------------------------------------------------------|-----------|------|-------|-------|
| Protein phosphatase 1H (PP2C domain containing)                                                     | AU040848  | 2.37 | 0.01  | 0.037 |
| Solute carrier family 25 (mitochondrial carrier, adenine nucleotide translocator), member 5         | C81442    | 2.36 | 0.002 | 0.05  |
| Myelin basic protein expression factor 2, repressor                                                 | U13262    | 2.36 | 0.017 | 0.006 |
| Transcribed locus                                                                                   | BG061923  | 2.35 | 0.011 | 0.026 |
| SH3 domain protein D19                                                                              | NM_012059 | 2.34 | 0.002 | 0.049 |
| Follistatin                                                                                         | NM_008046 | 2.33 | 0.007 | 0.024 |
| Guanidinoacetate methyltransferase                                                                  | AF015887  | 2.32 | 0.001 | 0.037 |
| ESTs                                                                                                | A1987844  | 2.31 | 0.011 | 0.022 |
| Signal peptide, CUB domain, EGF-like 2                                                              | B1133839  | 2.3  | 0.005 | 0.013 |
| ESTs                                                                                                | BB361398  | 2.3  | 0.016 | 0.026 |
| Transcribed locus                                                                                   | BM241342  | 2.27 | 0.011 | 0.024 |
| Chordin-like 1                                                                                      | AV144145  | 2.27 | 0.013 | 0.021 |
| Myosin, heavy polypeptide 9, non-muscle                                                             | NM_022410 | 2.25 | 0.002 | 0.044 |
| Transcribed locus, strongly similar to NP_001019474.1 Lix1 homolog (mouse)-like [Rattus norvegicus] | BM502719  | 2.24 | 0.003 | 0.05  |
| Transcribed locus                                                                                   | AV352768  | 2.24 | 0.018 | 0.035 |
| Ubiquitin specific peptidase 7                                                                      | BM247366  | 2.23 | 0.006 | 0.006 |
| Transcribed locus                                                                                   | BB218653  | 2.23 | 0.01  | 0.034 |
| RIKEN cDNA 4933407H18 gene                                                                          | BB476293  | 2.23 | 0.004 | 0.005 |
| Transmembrane protein 120A                                                                          | AV069499  | 2.22 | 0.007 | 0.025 |
| Transcribed locus                                                                                   | BM234702  | 2.22 | 0.012 | 0.034 |
| SEC14 and spectrin domains 1                                                                        | AV276619  | 2.22 | 0.005 | 0.011 |
| Ubiquitin associated protein 2-like                                                                 | AA833196  | 2.2  | 0.033 | 0.001 |
| Transcribed locus                                                                                   | BQ033755  | 2.2  | 0.015 | 0.049 |
| Integrin beta 3                                                                                     | AV352983  | 2.19 | 0.02  | 0.042 |
| Growth differentiation factor 10                                                                    | L42114    | 2.19 | 0.005 | 0.004 |
| Transcribed locus                                                                                   | AV235415  | 2.18 | 0.014 | 0.02  |
| Tissue factor pathway inhibitor                                                                     | AF004833  | 2.18 | 0.006 | 0.039 |
| Ring finger protein 215                                                                             | C77903    | 2.18 | 0.006 | 0.032 |
| Rho GTPase activating protein 18                                                                    | BB667215  | 2.18 | 0.005 | 0.02  |
| Neurotrophic tyrosine kinase, receptor, type 2                                                      | AK018789  | 2.17 | 0.006 | 0.007 |
| Coiled-coil domain containing 102A                                                                  | BB375402  | 2.17 | 0.012 | 0.049 |
| Ankyrin repeat domain 29                                                                            | AV370837  | 2.17 | 0.014 | 0.034 |
| Zinc finger, CCHC domain containing 11                                                              | BG060248  | 2.16 | 0.017 | 0.014 |
| Transcribed locus                                                                                   | AK017223  | 2.16 | 0.015 | 0.011 |
| Pleckstrin homology domain containing, family O member 1                                            | NM_023320 | 2.16 | 0.002 | 0.034 |
| Glycoprotein m6b                                                                                    | AF254879  | 2.16 | 0.004 | 0.038 |
| Transcribed locus                                                                                   | BM243944  | 2.15 | 0.016 | 0.029 |
| Transcribed locus                                                                                   | BM239436  | 2.14 | 0.025 | 0.026 |
| Ring finger protein 213                                                                             | AW556558  | 2.14 | 0.001 | 0.022 |
| RIKEN cDNA 4933439C10 gene                                                                          | AV205521  | 2.14 | 0.012 | 0.038 |
| ESTs, Weakly similar to RIKEN cDNA 5730493B19 (Mus musculus) (M.musculus)                           | AU040379  | 2.14 | 0.012 | 0.005 |
| ATPase, Ca <sup>++</sup> transporting, cardiac muscle, slow twitch 2                                | BG063183  | 2.14 | 0.015 | 0.022 |
| TYRO3 protein tyrosine kinase 3                                                                     | AB000828  | 2.13 | 0.034 | 0.029 |
| RIKEN cDNA 1110034A24 gene                                                                          | BB815668  | 2.13 | 0.015 | 0.009 |

|                                                                                        |           |       |        |        |
|----------------------------------------------------------------------------------------|-----------|-------|--------|--------|
| Transmembrane protein 68                                                               | BC016240  | 2.12  | 0.006  | 0.016  |
| Sema domain, immunoglobulin domain (Ig), short basic domain, secreted, (semaphorin) 3B | NM_009153 | 2.12  | 0.007  | 0.038  |
| Protein kinase N1                                                                      | AI463328  | 2.12  | 0.007  | 0.045  |
| Insulin-like growth factor binding protein 4                                           | BB787243  | 2.12  | 0.0001 | 0.019  |
| expressed sequence AA407331                                                            | AA407331  | 2.12  | 0.014  | 0.038  |
| RNA binding motif protein 43                                                           | BC003333  | 2.11  | 0.009  | 0.047  |
| expressed sequence AI197429                                                            | BI082172  | 2.11  | 0.013  | 0.04   |
| CDNA sequence BC067047                                                                 | BB794978  | 2.11  | 0.003  | 0.011  |
| BTB and CNC homology 2                                                                 | BB529913  | 2.11  | 0.013  | 0.04   |
| Kelch domain containing 5                                                              | BB795533  | 2.1   | 0.009  | 0.026  |
| Carbohydrate (N-acetylgalactosamine 4-0) sulfotransferase 14                           | AK011230  | 2.1   | 0.004  | 0.019  |
| Rho GTPase activating protein 4                                                        | NM_138630 | 2.09  | 0.018  | 0.027  |
| Phosphodiesterase 3B, cGMP-inhibited                                                   | AV270888  | 2.09  | 0.004  | 0.024  |
| NLR family, CARD domain containing 5                                                   | AV277444  | 2.09  | 0.01   | 0.031  |
| La ribonucleoprotein domain family, member 6                                           | NM_026235 | 2.09  | 0.014  | 0.01   |
| Zinc finger with KRAB and SCAN domains 3                                               | BQ084812  | 2.07  | 0.006  | 0.031  |
| ESTs                                                                                   | BB115513  | 2.07  | 0.016  | 0.031  |
| ESTs                                                                                   | BB541054  | 2.07  | 0.016  | 0.049  |
| Transcribed locus                                                                      | AV230978  | 2.06  | 0.015  | 0.025  |
| HpaII tiny fragments locus 9c                                                          | NM_008307 | 2.06  | 0.009  | 0.033  |
| ESTs                                                                                   | BB162048  | 2.06  | 0.016  | 0.015  |
| Transcribed locus                                                                      | BB414446  | 2.05  | 0.002  | 0.023  |
| Interleukin 6 signal transducer                                                        | BI102913  | 2.05  | 0.002  | 0.008  |
| 3-ketodihydrosphingosine reductase                                                     | AK018155  | 2.05  | 0.005  | 0.048  |
| Transcribed locus                                                                      | BB034265  | 2.04  | 0.004  | 0.049  |
| Transcribed locus                                                                      | AK017680  | 2.04  | 0.006  | 0.017  |
| Single-stranded DNA binding protein 2                                                  | AK005150  | 2.04  | 0.015  | 0.012  |
| Signal transducer and activator of transcription 1                                     | AW214029  | 2.04  | 0.006  | 0.042  |
| Ras-related associated with diabetes                                                   | NM_019662 | 2.04  | 0.005  | 0.042  |
| Nischarin                                                                              | BB025231  | 2.04  | 0.003  | 0.019  |
| Lysophosphatidic acid receptor 1                                                       | U70622    | 2.04  | 0.003  | 0.019  |
| Diacylglycerol kinase, eta                                                             | AV276089  | 2.03  | 0.011  | 0.036  |
| Transcribed locus                                                                      | AV340292  | 2.02  | 0.025  | 0.0001 |
| Transcribed locus                                                                      | AV272196  | 2.02  | 0.013  | 0.04   |
| Poly (ADP-ribose) polymerase family, member 14                                         | BC021340  | 2.02  | 0.004  | 0.009  |
| Histocompatibility 2, T region locus 23                                                | NM_010398 | 2.02  | 0.001  | 0.017  |
| Frequenin homolog (Drosophila)                                                         | BE990928  | 2.02  | 0.003  | 0.045  |
| Dedicator of cytokinesis 8                                                             | NM_028785 | 2.02  | 0.006  | 0.043  |
| Cyclin D1                                                                              | NM_007631 | 2.02  | 0.002  | 0.032  |
| Tia1 cytotoxic granule-associated RNA binding protein-like 1                           | BM122619  | 2.01  | 0.003  | 0.022  |
| matrilin 2                                                                             | BB338441  | 2.01  | 0.006  | 0.025  |
| Epidermal growth factor receptor pathway substrate 8                                   | NM_007945 | 2     | 0.003  | 0.044  |
| Inhibitor of Bruton agammaglobulinemia tyrosine kinase                                 | BM250711  | 0.5   | 0.002  | 0.037  |
| Transcribed locus                                                                      | AW546142  | 0.498 | 0.003  | 0.018  |
| Transcribed locus                                                                      | AV236736  | 0.498 | 0.01   | 0.002  |
| progesterone and adiponectin receptor family member III                                | AK018174  | 0.498 | 0.01   | 0.021  |

|                                                                                |           |       |        |       |
|--------------------------------------------------------------------------------|-----------|-------|--------|-------|
| Kelch domain containing 6                                                      | AK014702  | 0.495 | 0.011  | 0.011 |
| Xenotropic and polytropic retrovirus receptor 1                                | AV337591  | 0.493 | 0.002  | 0.047 |
| Potassium voltage gated channel, Shab-related subfamily, member 1              | BB324482  | 0.488 | 0.002  | 0.016 |
| Myosin, heavy polypeptide 1, skeletal muscle, adult                            | AJ002522  | 0.488 | 0.001  | 0.044 |
| RIKEN cDNA 1190003M12 gene                                                     | AK004474  | 0.485 | 0.006  | 0.022 |
| Ariadne ubiquitin-conjugating enzyme E2 binding protein homolog 1 (Drosophila) | BB354785  | 0.485 | 0.004  | 0.047 |
| Fas (TNF receptor superfamily member 6)                                        | BG976607  | 0.483 | 0.001  | 0.001 |
| Glutamic pyruvate transaminase (alanine aminotransferase) 2                    | BG069993  | 0.481 | 0.0001 | 0.025 |
| Transcribed locus                                                              | AK018397  | 0.472 | 0.004  | 0.031 |
| ESTs, Weakly similar to ZF90 MOUSE ZINC FINGER PROTEIN 90 (M.musculus)         | C76431    | 0.472 | 0.016  | 0.008 |
| Transcribed locus                                                              | BB081359  | 0.469 | 0.007  | 0.005 |
| Gene model 967, (NCBI)                                                         | AW457804  | 0.469 | 0.007  | 0.012 |
| Patatin-like phospholipase domain containing 8                                 | BB076314  | 0.467 | 0.003  | 0.012 |
| Zinc finger protein 644                                                        | AU015726  | 0.465 | 0.009  | 0.025 |
| Insulin-like growth factor 2 mRNA binding protein 3                            | BG092043  | 0.461 | 0.002  | 0.032 |
| Solute carrier family 7 (cationic amino acid transporter, y+ system), member 2 | BF533509  | 0.455 | 0.01   | 0.018 |
| AF4/FMR2 family, member 1                                                      | BB586268  | 0.455 | 0.008  | 0.034 |
| Transcribed locus                                                              | C79043    | 0.452 | 0.002  | 0.006 |
| Kinesin family member 21A                                                      | BB342219  | 0.45  | 0.002  | 0.044 |
| Glycerol-3-phosphate dehydrogenase 1 (soluble)                                 | BC019391  | 0.45  | 0.0001 | 0.041 |
| UEV and lactate/malate dehydrogenase domains                                   | NM_016855 | 0.441 | 0.006  | 0.001 |
| G protein-coupled receptor 137C                                                | BQ175524  | 0.433 | 0.008  | 0.001 |
| D-aspartate oxidase                                                            | BC006690  | 0.433 | 0.001  | 0.03  |
| Adenylate kinase 1                                                             | BE373450  | 0.431 | 0.007  | 0.037 |
| ESTs                                                                           | BB165757  | 0.418 | 0.009  | 0.025 |
| Minichromosome maintenance complex component 9                                 | AV312905  | 0.413 | 0.005  | 0.021 |
| ESTs, Moderately similar to I49130 reverse transcriptase - mouse (M.musculus)  | BB080140  | 0.412 | 0.007  | 0.031 |
| Sortilin-related receptor, LDLR class A repeats-containing                     | BI648081  | 0.391 | 0.004  | 0.015 |
| RIKEN cDNA 3222402P14 gene                                                     | BB283973  | 0.391 | 0.0001 | 0.023 |
| Protein kinase, cAMP dependent regulatory, type II alpha                       | AV112640  | 0.366 | 0.001  | 0.028 |
| Pregnancy-specific glycoprotein 28                                             | AF113598  | 0.36  | 0.004  | 0.006 |
| Cytochrome P450, family 4, subfamily x, polypeptide 1                          | BB171122  | 0.358 | 0.017  | 0.029 |
| Nicotinamide phosphoribosyltransferase                                         | AW989410  | 0.357 | 0.002  | 0.042 |
| Melanin-concentrating hormone receptor 1                                       | BE647763  | 0.35  | 0.008  | 0.014 |
| TEA domain family member 1                                                     | BB546942  | 0.347 | 0.009  | 0.017 |
| ESTs                                                                           | BB821700  | 0.344 | 0.01   | 0.009 |
| Murine (DBA2) mRNA fragment for gag related peptide                            | BB662083  | 0.339 | 0.002  | 0.027 |
| Aquaporin 4                                                                    | AW489155  | 0.336 | 0.004  | 0.03  |
| Transmembrane protein 106B                                                     | AK018015  | 0.333 | 0.013  | 0.042 |
| Solute carrier family 38, member 4                                             | AK003626  | 0.321 | 0.0001 | 0.048 |
| Transcribed locus, strongly similar to NP_062686.1 ring-box 1 [Mus musculus]   | AV038578  | 0.299 | 0.003  | 0.025 |

|                                                                                                                            |          |       |       |       |
|----------------------------------------------------------------------------------------------------------------------------|----------|-------|-------|-------|
| Calcium/calmodulin-dependent protein kinase II alpha                                                                       | X14836   | 0.292 | 0.002 | 0.015 |
| Hypothetical protein LOC100042207                                                                                          | AK017182 | 0.28  | 0.005 | 0.016 |
| Transmembrane 7 superfamily member 3                                                                                       | AV114231 | 0.27  | 0.012 | 0.005 |
| EST X83313                                                                                                                 | BG065719 | 0.253 | 0.005 | 0.042 |
| Transcribed locus                                                                                                          | AV268386 | 0.216 | 0.007 | 0.019 |
| ESTs, Moderately similar to YO11 MOUSE<br>HYPOTHETICAL PROTEIN ORF-1137 (M.musculus)                                       | AV309800 | 0.211 | 0.002 | 0.007 |
| Tubulin tyrosine ligase-like family, member 7                                                                              | AK014905 | 0.19  | 0.008 | 0.03  |
| ESTs, Weakly similar to JAK3 MOUSE TYROSINE-<br>PROTEIN KINASE JAK3 (M.musculus)                                           | BG083989 | 0.109 | 0.002 | 0.021 |
| ESTs, Weakly similar to GNMSLL retrovirus-related<br>reverse transcriptase homolog - mouse<br>retrotransposon (M.musculus) | AI506532 | 0.087 | 0.002 | 0.021 |
| ESTs                                                                                                                       | BB099075 | 0.084 | 0.004 | 0.002 |
